# Supplementary material for: Influence of alkyl chains on photovoltaic properties of 3D rylene propeller electron acceptors
Source: Royal Society of Chemistry journal article supplement (doi:10.1039/c6ta09049d), 2016-12-29
Supplement: c6ta09049d1.pdf [file c6ta09049d1.pdf]

## Supporting Information

### Influence of Alkyl Chains on Photovoltaic Properties of 3D Rylene

#### Propeller Electron Acceptors

Huiting Fu,<sup>a,b,d</sup> Dong Meng,<sup>a,d</sup> Xiangyi Meng,<sup>c</sup> Xiaobo Sun,<sup>b</sup> Lijun Huo,<sup>b</sup> Yuzun Fan,<sup>b</sup> Yan Li,<sup>a</sup> Wei Ma,<sup>\*c</sup> Yanming Sun,<sup>\*b</sup> and Zhaohui Wang<sup>\*a</sup>

<sup>a</sup> *Beijing National Laboratory for Molecular Sciences, Key Laboratory of Organic Solids, Institute of Chemistry, Chinese Academy of Sciences, Beijing 100190, P. R. China. \*E-mail: wangzhaohui@iccas.ac.cn*

<sup>b</sup> *Heeger Beijing Research and Development Center, School of Chemistry and Environment, Beihang University, Beijing 100191, P. R. China. \*E-mail: sunym@buaa.edu.cn*

<sup>c</sup> *State Key Laboratory for Mechanical Behavior of Materials, Xi'an Jiaotong University, Xi'an 710049, P. R. China. \*E-mail: msewma@mail.xjtu.edu.cn*

<sup>d</sup> *University of Chinese Academy of Sciences, Beijing 100049, P. R. China.*

## 1. Measurements.

$^1\text{H}$  NMR (500 MHz) and  $^{13}\text{C}$  NMR (125 MHz) spectra were recorded in deuterated solvents on a Bruker ADVANCE 500 NMR Spectrometer.  $J$  values are expressed in Hz and quoted chemical shifts are in ppm downfield from tetramethylsilane (TMS) reference using the residual protonated solvent as an internal standard. The signals have been designated as follows: s (singlet), d (doublet), t (triplet), q (quartet), sd (singlet doublet), dd (doublet doublet) and m (multiplets). High resolution mass spectra (HRMS) were determined on IonSpec 4.7 Tesla Fourier Transform Mass Spectrometer. UV-vis absorption spectra were acquired with Hitachi (Model U-3010) UV-vis spectrophotometer in a 1-cm quartz cell. Cyclic voltammogram (CV) measurement were carried out on a Zahner IM6e electrochemical workstation using glassy carbon discs as the working electrode, Pt wire as the counter electrode, Ag/AgCl electrode as the reference electrode at a scanning rate of 100 mVs<sup>-1</sup> under a nitrogen atmosphere. 0.1 M tetrabutylammoniumhexafluorophosphate ( $\text{Bu}_4\text{NPF}_6$ ) dissolved in  $\text{CH}_2\text{Cl}_2$  or acetonitrile (HPLC grade) was employed as the supporting electrolyte, which was calibrated by the ferrocene/ferroncenium ( $\text{Fc}/\text{Fc}^+$ ) as the redox couple.

## 2. Thermal gravimetric analysis and DSC thermograms.

**Table S1** Thermal properties data of TPH-4-TPH-7 molecules

| Molecules                         | TPH-4 | TPH-5 | TPH-6 | TPH-7 |
|-----------------------------------|-------|-------|-------|-------|
| $T_d^a$ (°C)                      | 374   | 391   | 351   | 363   |
| $T_m^b$ (°C)                      | 163   | 165   | 164   | 162   |
| $T_c^c$ (°C)                      | 123   | 123   | 123   | 123   |
| $\Delta H^d$ (J g <sup>-1</sup> ) | -1.54 | -1.54 | -1.58 | -0.71 |

<sup>a</sup>Thermal decomposition temperature corresponding to 5% weight loss in nitrogen measured by TGA; <sup>b</sup>Melting temperature determined from DSC; <sup>c</sup>Crystallization temperature determined from DSC; <sup>d</sup>Crystallization heat determined from DSC.

### 3. The chemical structure and optical properties of PDBT-T1.

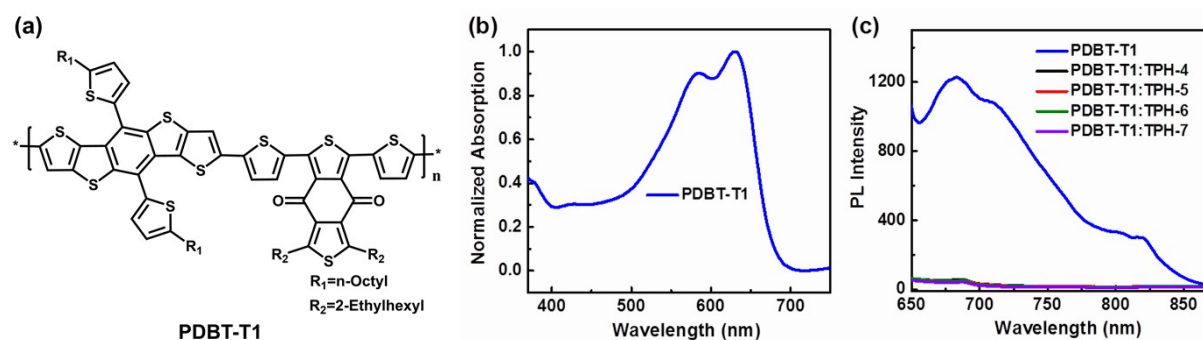

**Fig. S1** (a) Chemical structure of PDBT-T1; (b) UV-vis absorption spectrum of neat PDBT-T1 film; (c) Photoluminescent spectra of neat PDBT-T1 film and PDBT-T1:TPH blend films (excitation at 630nm).

### 4. Cyclic voltammograms.

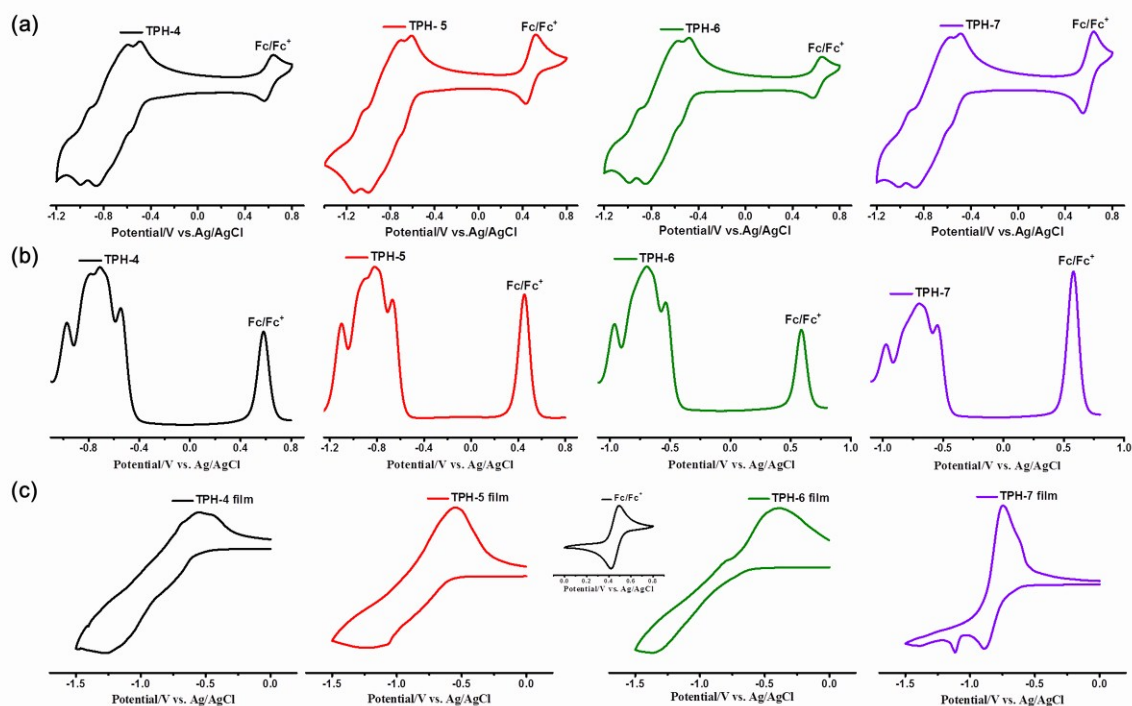

**Fig. S2** Cyclic voltammograms (a) and differential pulse voltammetry (DPV) profiles (b) of TPH-4-TPH-7 in  $\text{CH}_2\text{Cl}_2$  solution; (c) Cyclic voltammograms of TPH-4-TPH-7 in film and ferrocene in solution.

## 5. Photovoltaic performance.

**Table S2** Summary of device parameters of solar cells based on PDBT-T1: TPHs with different D/A weight ratios

| Active Layer   | D:A Thickness Ratio [nm] | $V_{oc}$ [V] | $J_{sc}$ [mA cm <sup>-2</sup> ] | FF [%]   | PCE [%] <sup>a)</sup> | PCE <sub>max</sub> [%] |
|----------------|--------------------------|--------------|---------------------------------|----------|-----------------------|------------------------|
| PDBT-T1 :TPH-4 | 1.3:1 111                | 0.983±0.004  | 11.98±0.11                      | 60.1±0.7 | 7.07±0.08             | 7.26                   |
|                | 1:1 104                  | 0.975±0.005  | 12.08±0.23                      | 62.2±1.2 | 7.33±0.09             | 7.41                   |
|                | 1:1.3 103                | 0.994±0.002  | 11.64±0.13                      | 59.6±0.9 | 6.89±0.14             | 6.99                   |
| PDBT-T1 :TPH-5 | 1.3:1 102                | 0.993±0.003  | 11.99±0.21                      | 59.6±0.7 | 7.10±0.08             | 7.22                   |
|                | 1:1 107                  | 0.982±0.003  | 12.06±0.13                      | 61.6±1.3 | 7.30±0.11             | 7.38                   |
|                | 1:1.3 106                | 0.993±0.001  | 11.72±0.26                      | 58.1±1.4 | 6.82±0.07             | 6.89                   |
| PDBT-T1 :TPH-6 | 1.3:1 108                | 0.979±0.002  | 11.95±0.20                      | 61.3±0.8 | 7.17±0.06             | 7.32                   |
|                | 1:1 104                  | 0.978±0.007  | 12.04±0.12                      | 62.9±0.2 | 7.40 ±0.07            | 7.49                   |
|                | 1:1.3 113                | 0.988±0.003  | 11.58±0.05                      | 60.6±0.4 | 6.94±0.10             | 7.08                   |
| PDBT-T1 :TPH-7 | 1.3:1 101                | 0.981±0.003  | 12.35±0.12                      | 59.9±0.5 | 7.26±0.15             | 7.42                   |
|                | 1:1 105                  | 0.982±0.004  | 12.33±0.34                      | 64.8±1.4 | 7.83 ±0.17            | 8.04                   |
|                | 1:1.3 95                 | 0.993±0.001  | 11.72±0.11                      | 61.9±0.4 | 7.20±0.07             | 7.30                   |

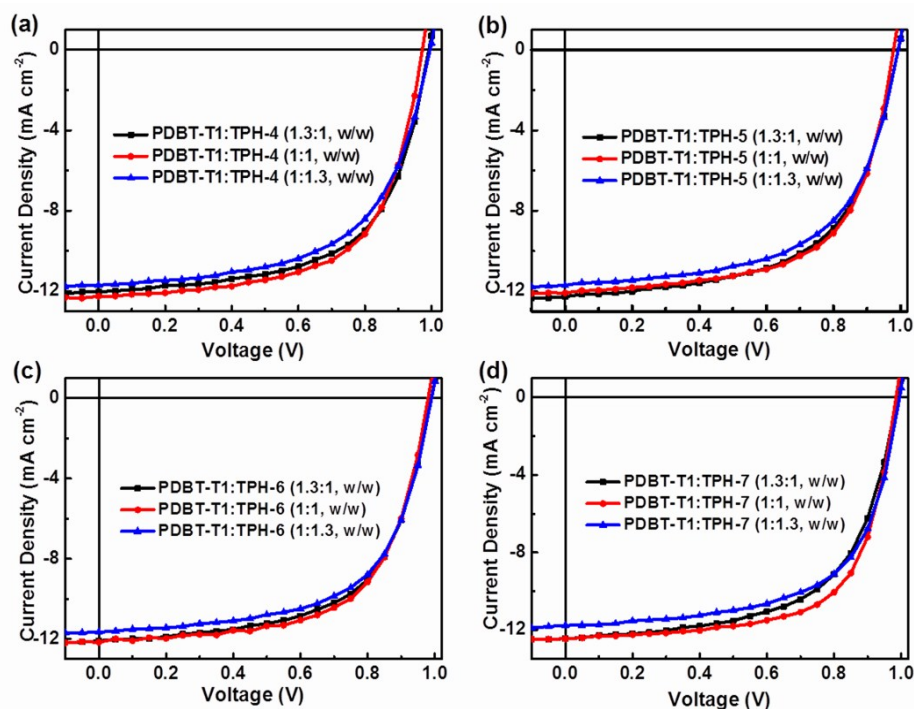

**Fig. S3** The characteristic current density-voltage ( $J$ - $V$ ) curves for the devices based on PDBT-T1: TPHs with different D/A weight ratios.

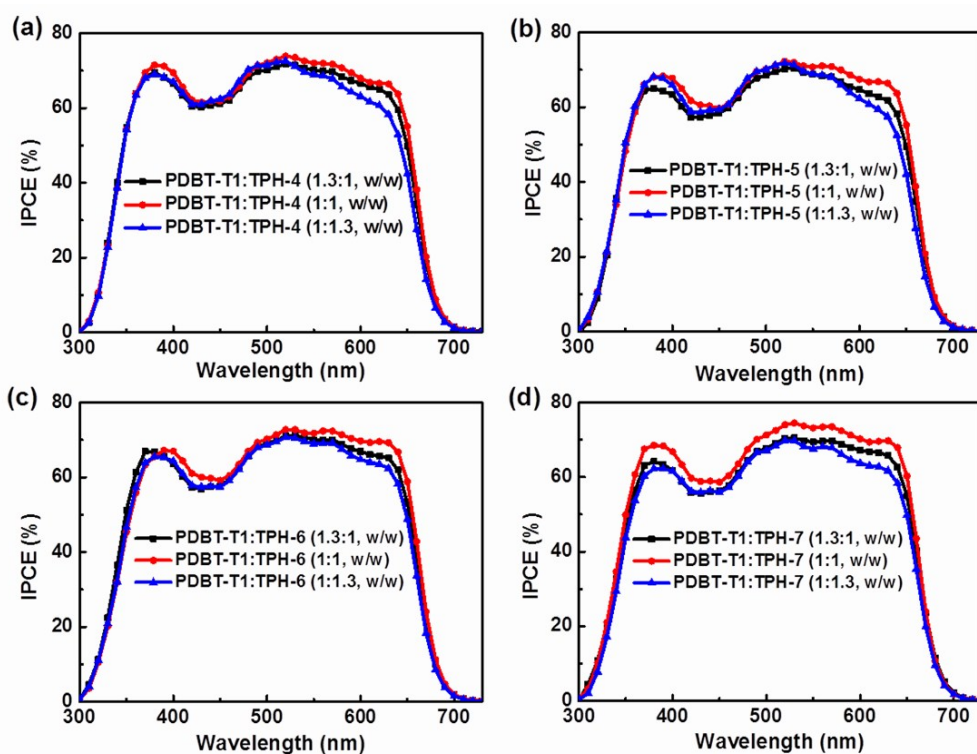

**Fig. S4** The IPCE spectra for the devices based on PDBT-T1: TPHs with different D/A weight ratios.

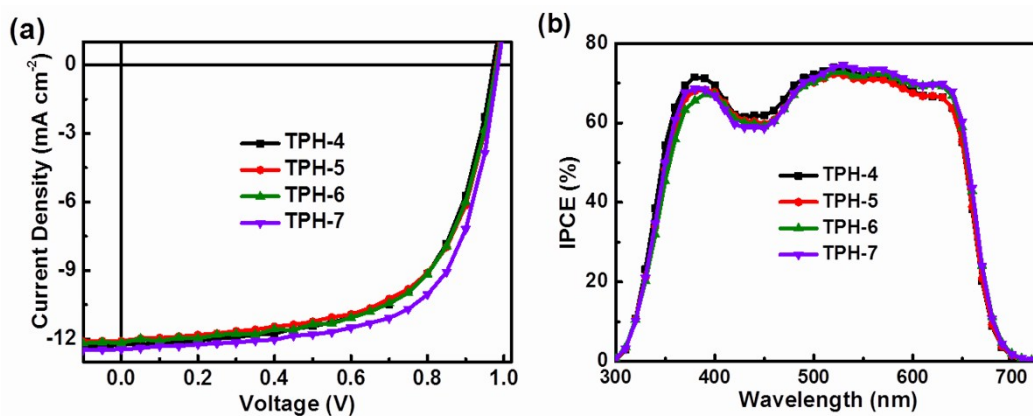

**Fig. S5** (a) Characteristic current density-voltage ( $J$ - $V$ ) curves for the optimal devices without DIO under simulated AM 1.5G irradiation ( $100 \text{ mW cm}^{-2}$ ) and the corresponding IPCE spectra.

## 6. Carrier Mobility Measurements.

Carrier mobility was measured using the space-charge-limit current (SCLC) method. The electron mobility for pure TPH films was measured with the device architecture of ITO/Al/TPHs/Al. For the blend films, the electron mobility was measured with the device architecture of ITO/Al/PDBT-T1:TPHs/Al and the hole mobility was measured with the device architecture of ITO/MoO<sub>x</sub>/PDBT-T1:TPHs/ MoO<sub>x</sub>/Al. The mobility was determined by fitting the dark current to the model of a single carrier SCLC, described by the Equation:

$$J=9\varepsilon_0\varepsilon_r\mu V^2/8L^3 \quad (1)$$

where  $J$  is the current density,  $\varepsilon_0$  is the permittivity of free space,  $\varepsilon_r$  is the relative dielectric constant of the transport medium,  $\mu$  is the charge mobility and  $L$  is the thickness of the acceptor.  $V=V_{\text{app}} - V_{\text{bi}}$ , where  $V_{\text{app}}$  is the applied voltage,  $V_{\text{bi}}$  is the offset voltage ( $V_{\text{bi}}$  is 0 V here). The electron mobility can be calculated from the slope of the  $J^{0.5} \sim V$  curves.

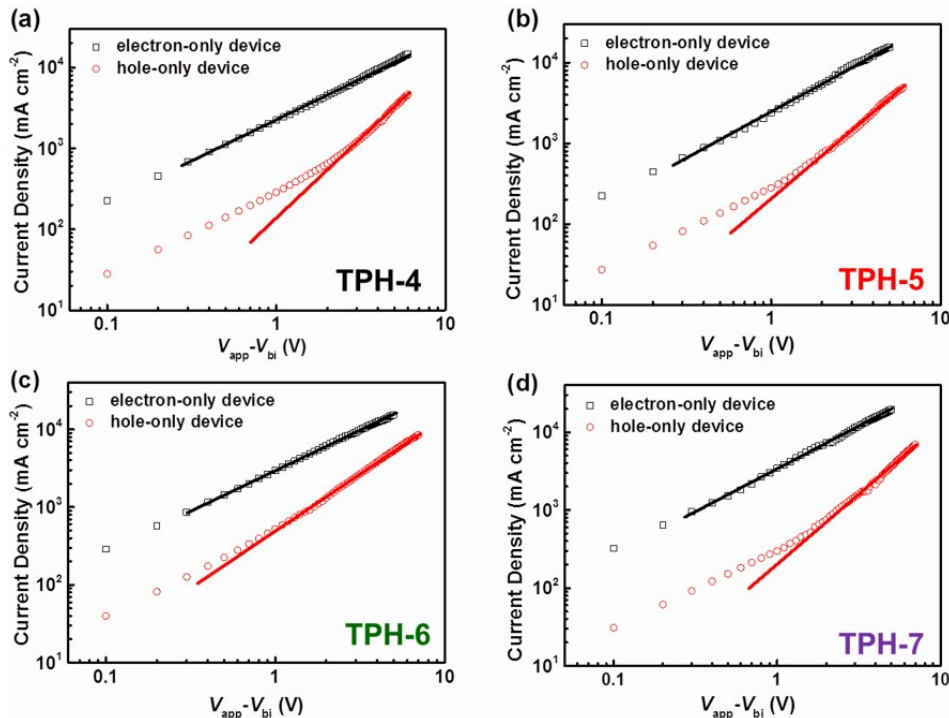

**Fig. S6** The experimental current density-applied voltage ( $J$ - $V$ ) characteristics for the hole-only devices, and electron-only devices for (a) PDBT-T1:TPH-4, (b) PDBT-T1:TPH-5 (c) PDBT-T1:TPH-6 and (d) PDBT-T1:TPH-7 blend films.

**Table S3** The electron and hole mobilities results measured by SCLC method based on PDBT-T1:TPHs blend films

| Blend<br>(0.25% DIO) | $\mu_e$<br>[ $10^{-3} \text{ cm}^2 \text{ V}^{-1} \text{ s}^{-1}$ ] | $\mu_h$<br>[ $10^{-3} \text{ cm}^2 \text{ V}^{-1} \text{ s}^{-1}$ ] | $\mu_e/\mu_h$ |
|----------------------|---------------------------------------------------------------------|---------------------------------------------------------------------|---------------|
| PDBT-T1:TPH-4        | $1.21 \pm 0.22$                                                     | $0.73 \pm 0.05$                                                     | 1.7           |
| PDBT-T1:TPH-5        | $1.44 \pm 0.13$                                                     | $0.85 \pm 0.12$                                                     | 1.7           |
| PDBT-T1:TPH-6        | $1.15 \pm 0.14$                                                     | $0.75 \pm 0.10$                                                     | 1.5           |
| PDBT-T1:TPH-7        | $1.55 \pm 0.16$                                                     | $1.08 \pm 0.05$                                                     | 1.4           |

## 7. Morphology analysis.

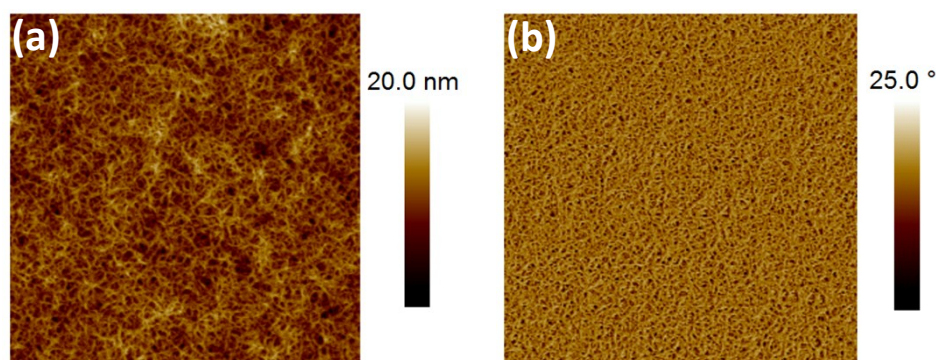

**Fig. S7** AFM height (a) and phase (b) images of the neat PDBT-T1 film.

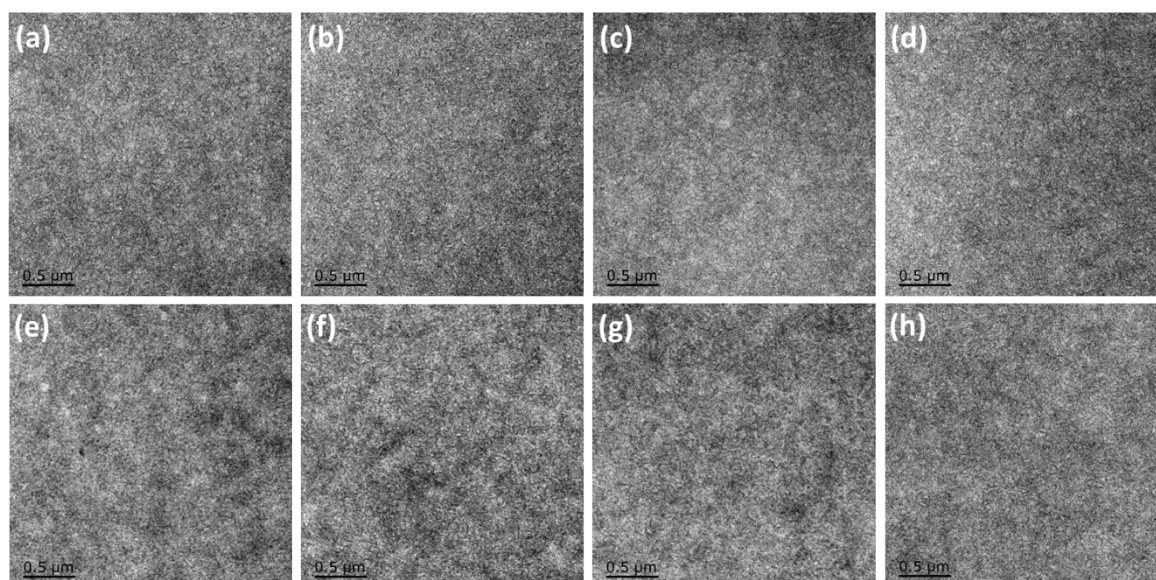

**Fig. S8** TEM images of blend films based on (a, e) PDBT-T1:TPH-4, (b, f) PDBT-T1:TPH-5, (c, g) PDBT-T1:TPH-6, and (d, h) PDBT-T1:TPH-7 (a, b, c, d) without and (e, f, g, h) with 0.25% DIO.

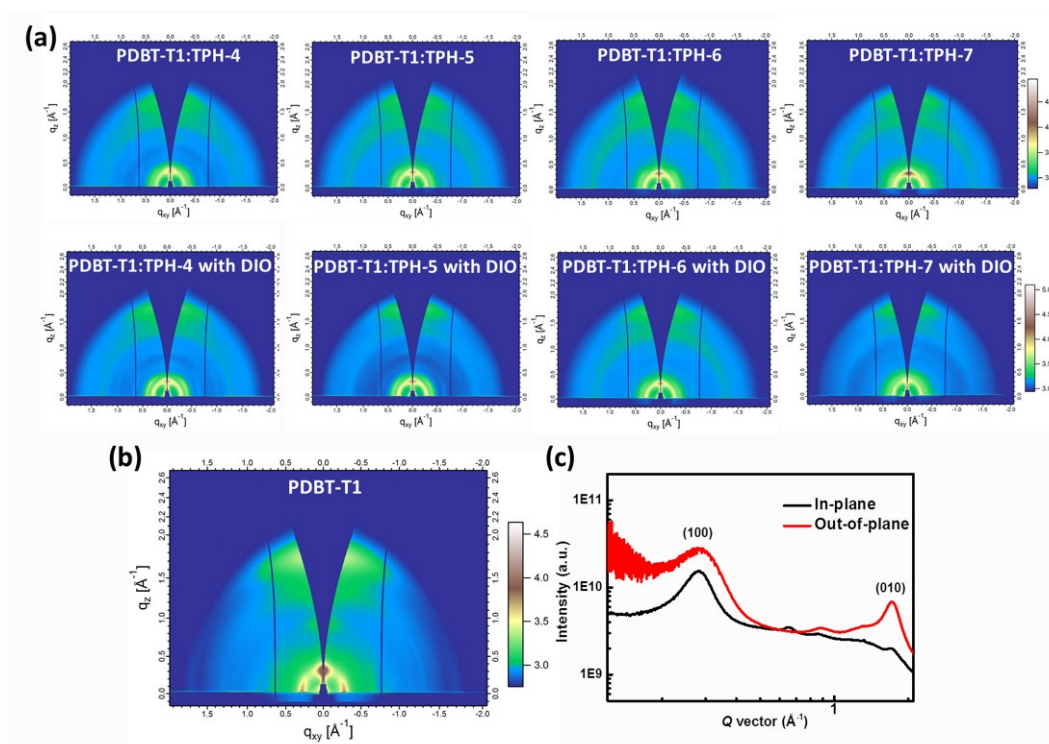

**Fig. S9** (a) 2D GIWAXS patterns for the blend films without and with DIO. (b) 2D GIWAXS patterns for PDBT-T1 neat film and (c) scattering profiles of in-plane and out-of-plane for PDBT-T1 neat film.

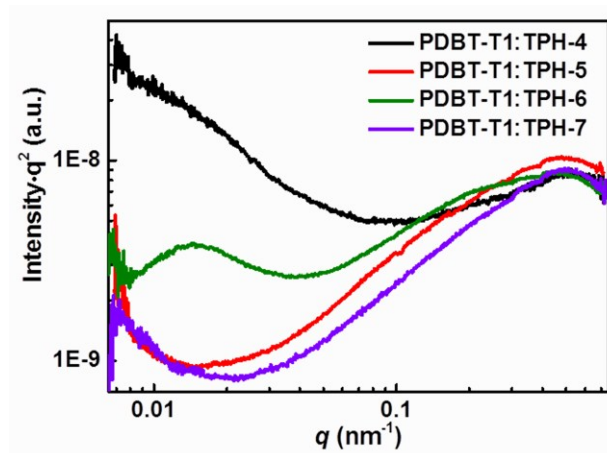

**Fig. S10** R-SoXS profiles for the blend films.



## 8. $^1\text{H}$ NMR Spectra and $^{13}\text{C}$ NMR Spectra.

### $^1\text{H}$ NMR Spectra of c-4-c-5 and TPH-4-TPH-5 (500 MHz, $\text{C}_2\text{D}_2\text{Cl}_4$ , 373.2 K)

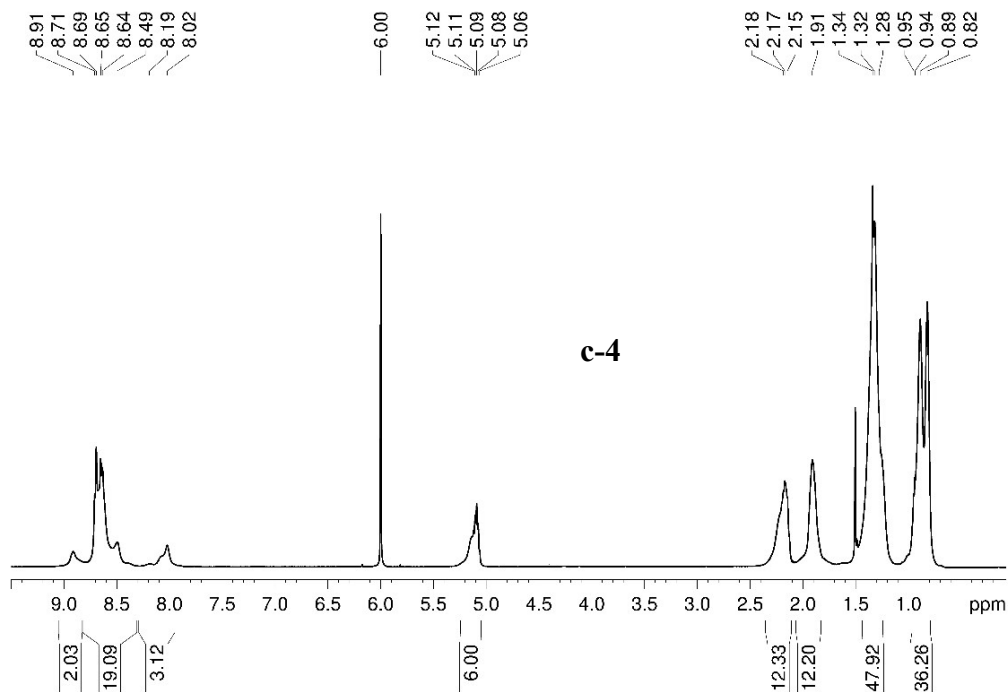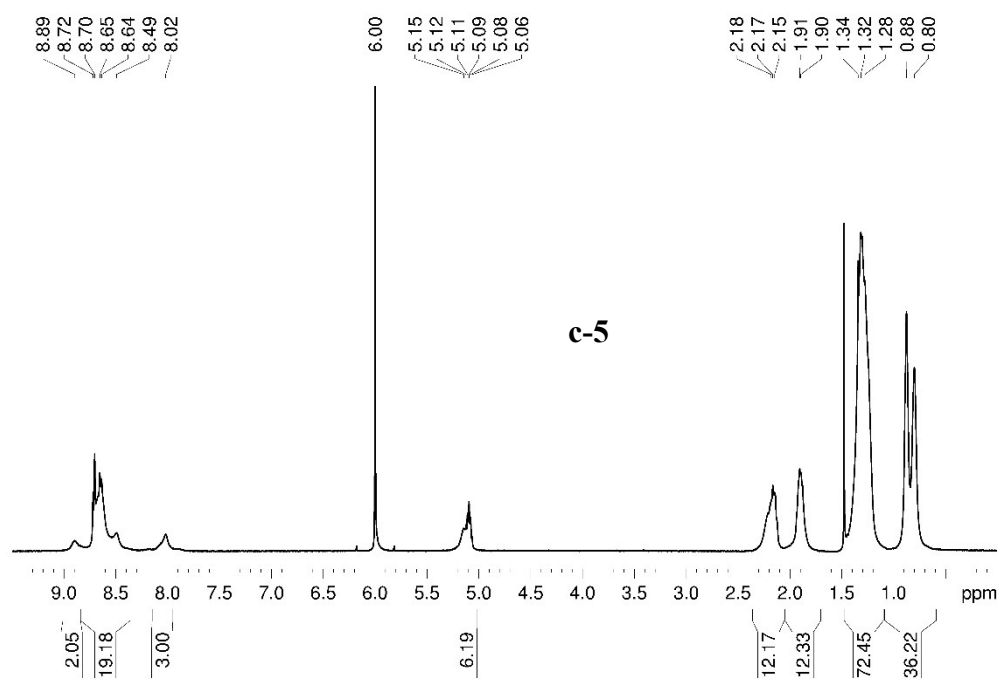

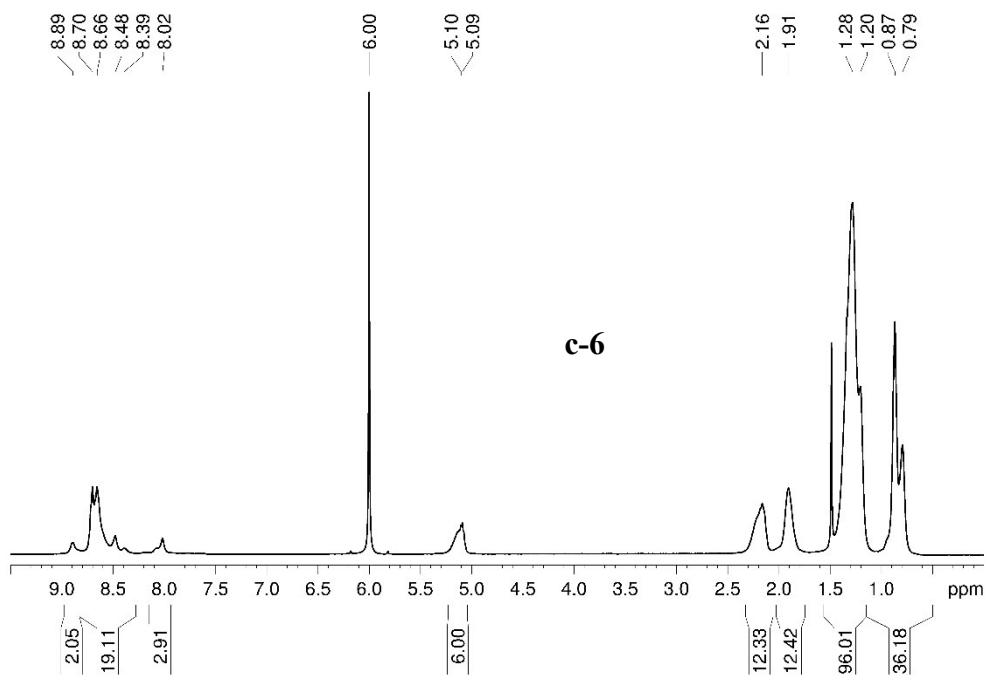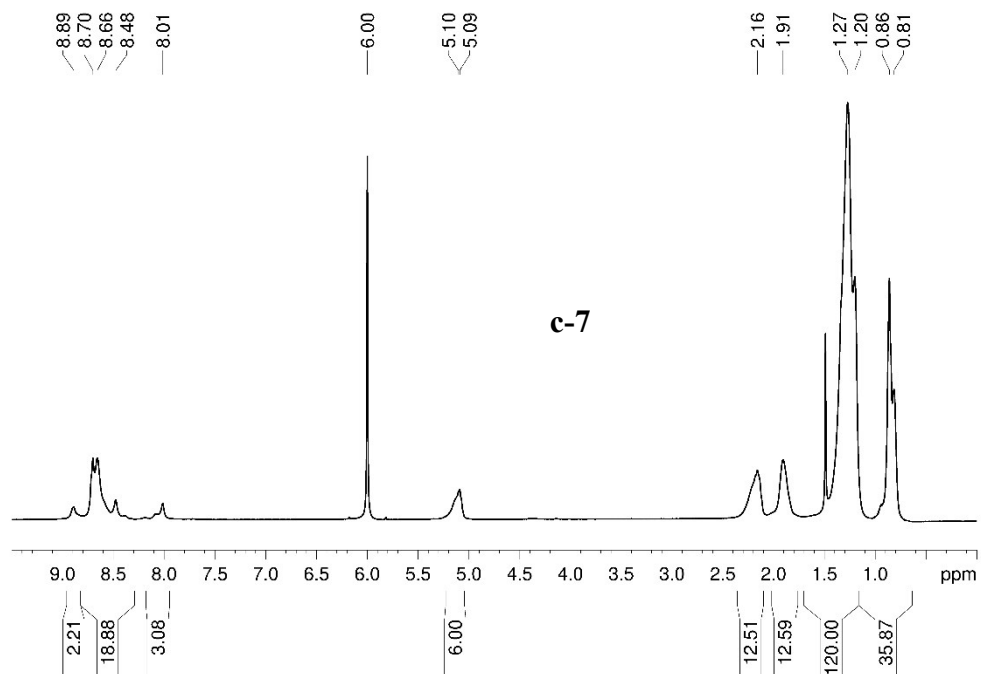

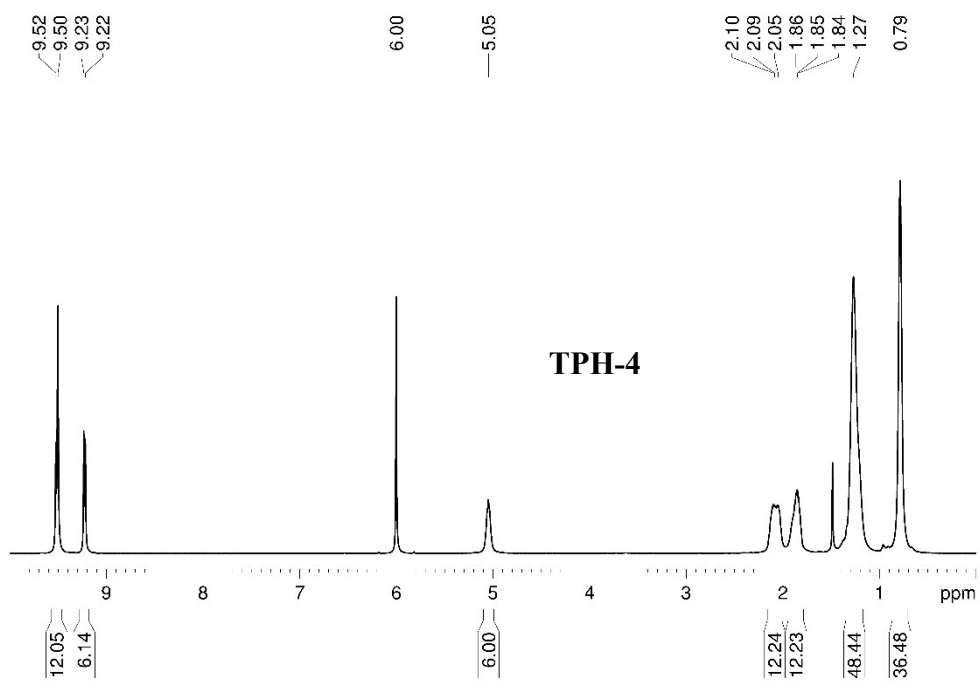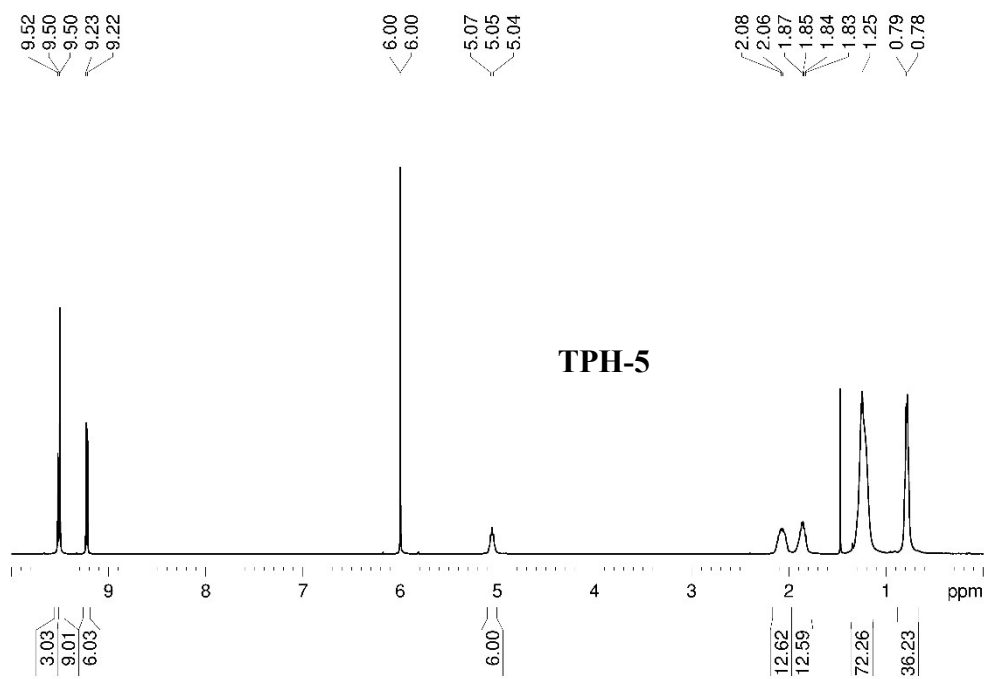

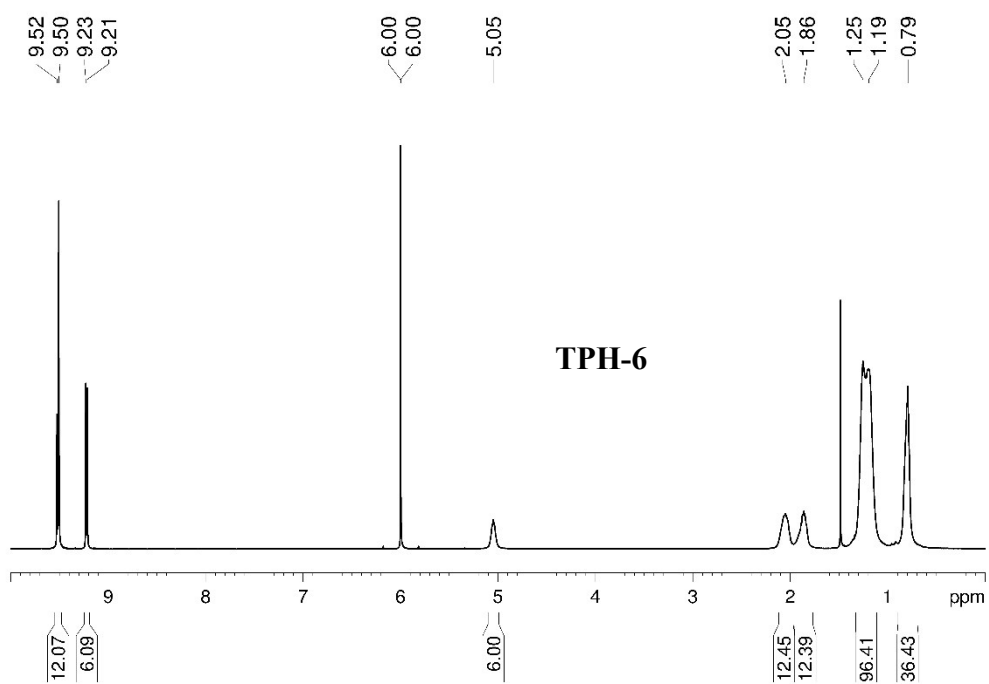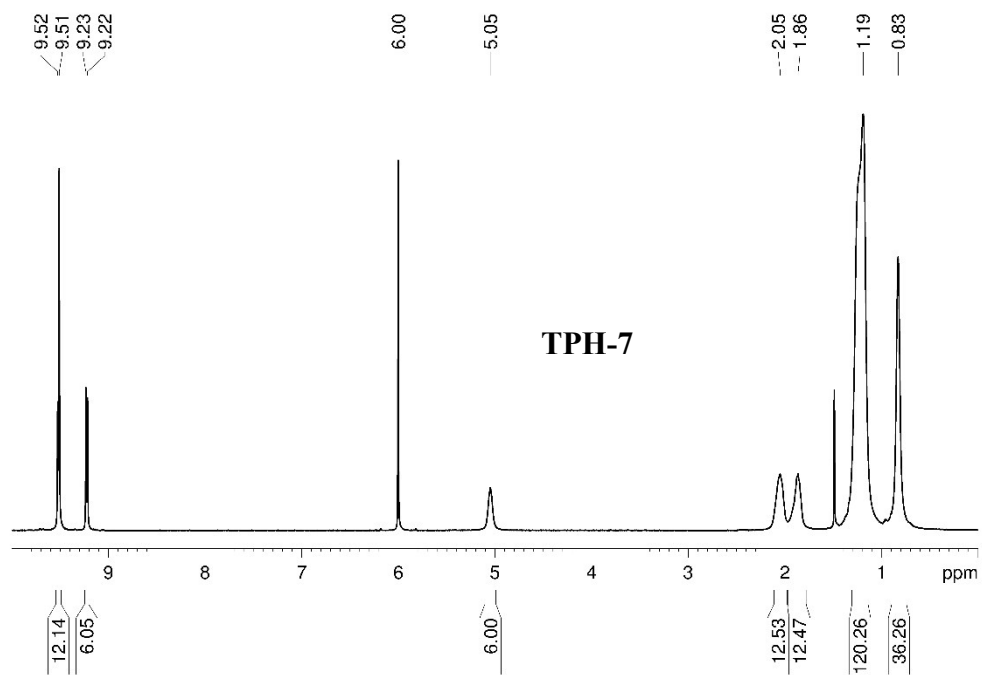

**$^{13}\text{C}$  NMR Spectra of c-4-c-7 and TPH-4-TPH-7(500 MHz,  $\text{C}_2\text{D}_2\text{Cl}_4$ , 373.2 K)**

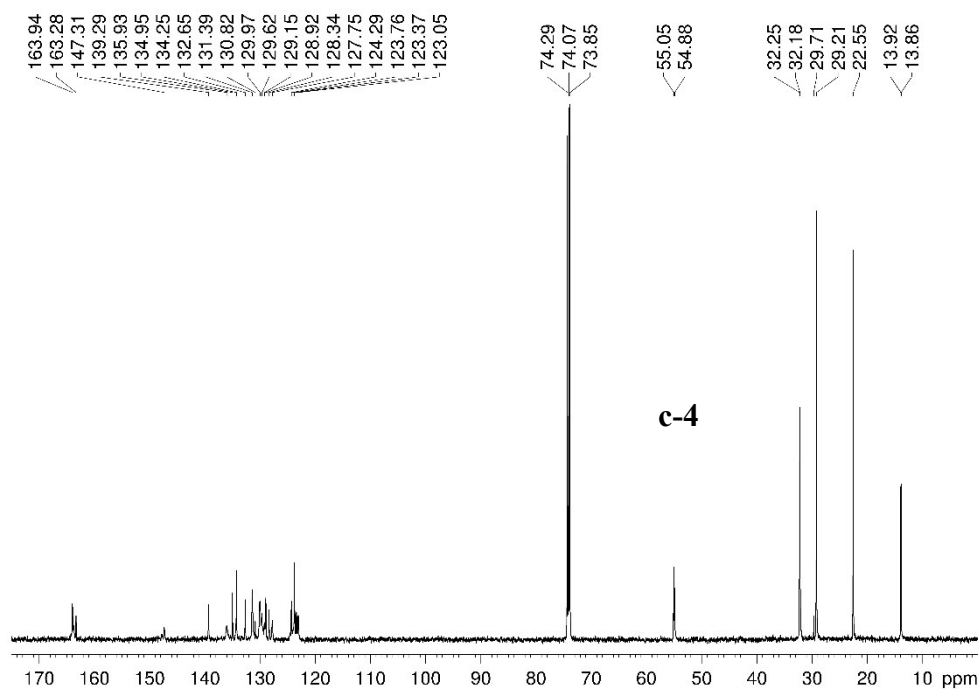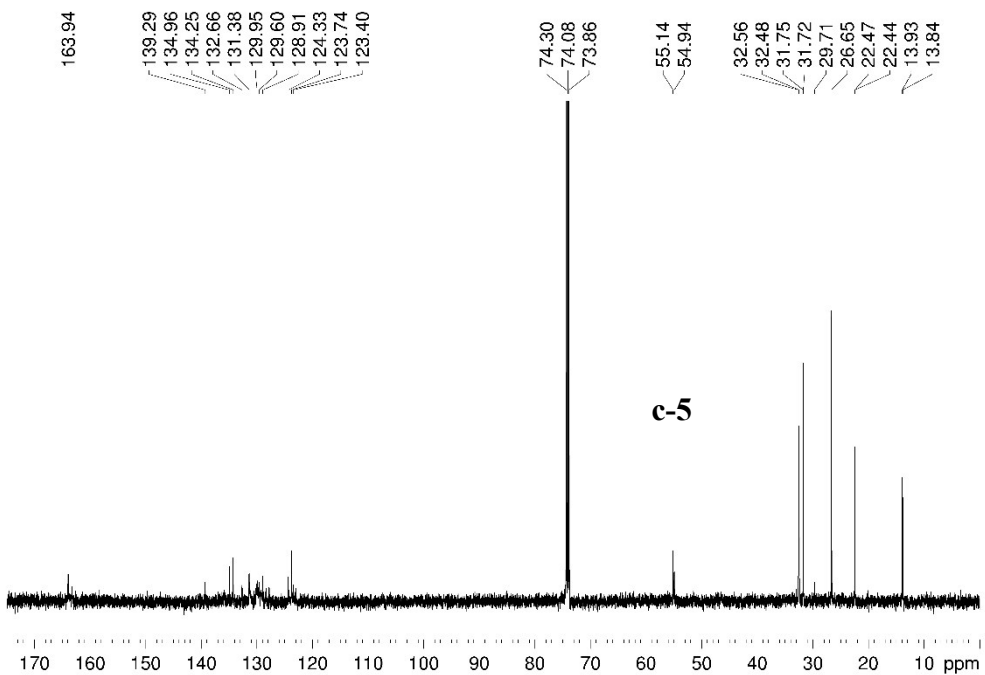

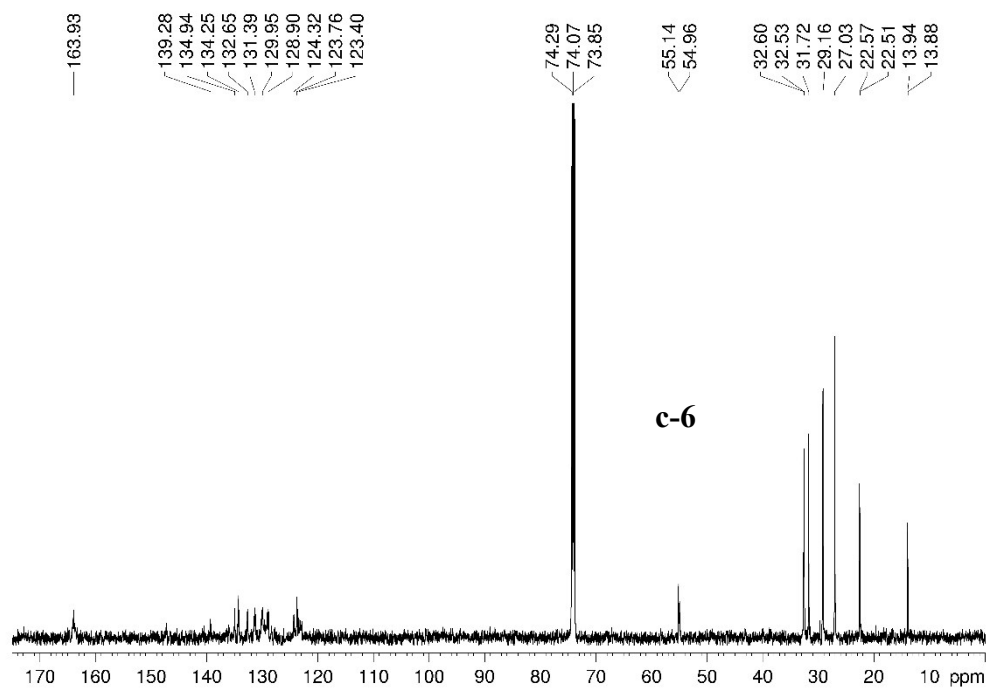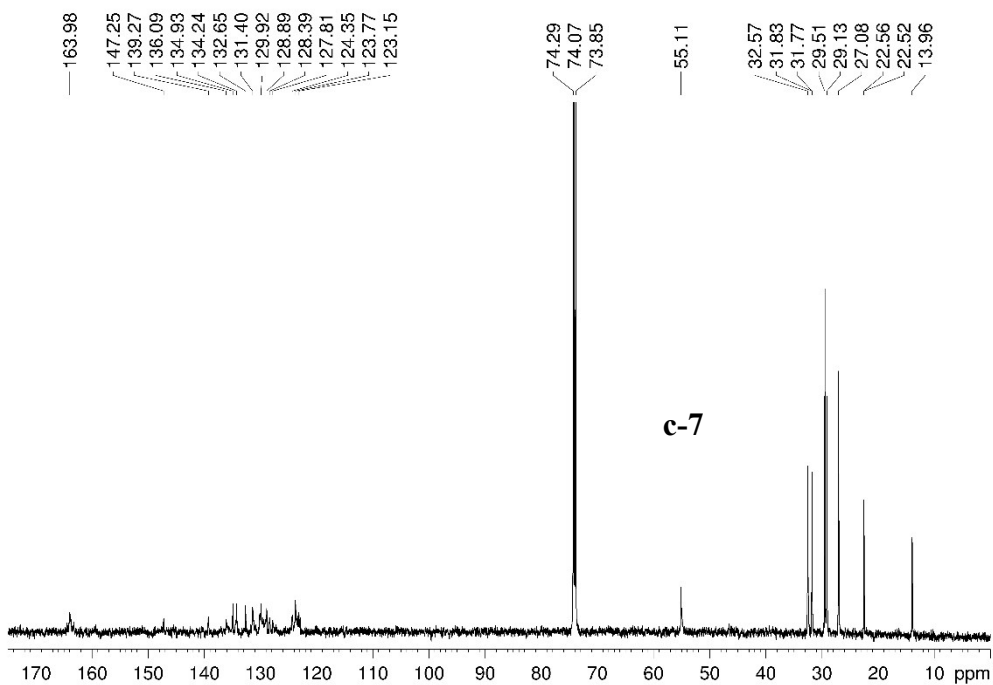

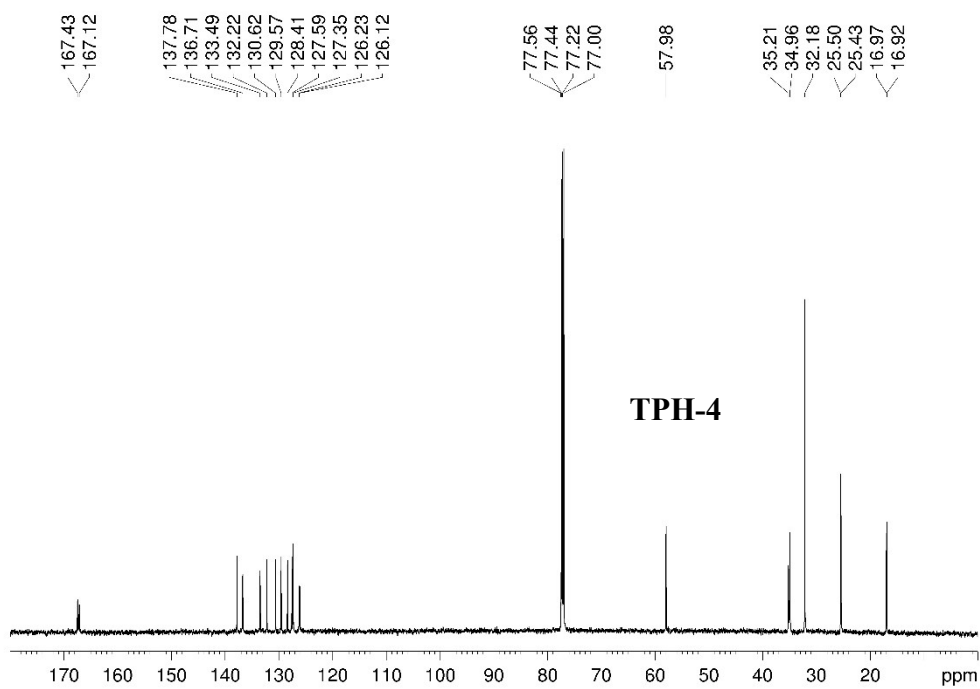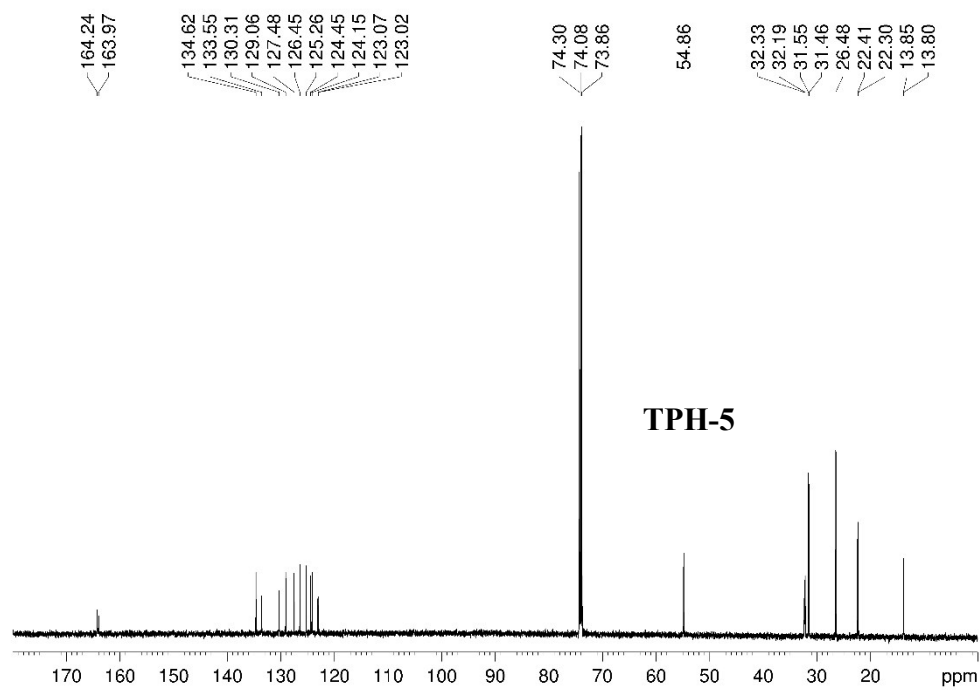

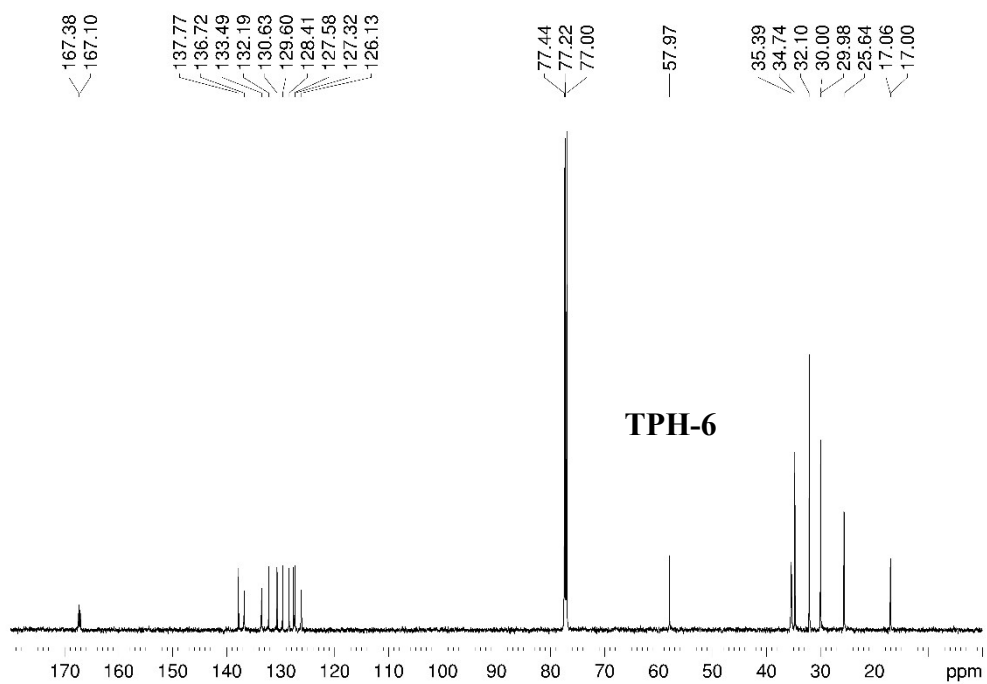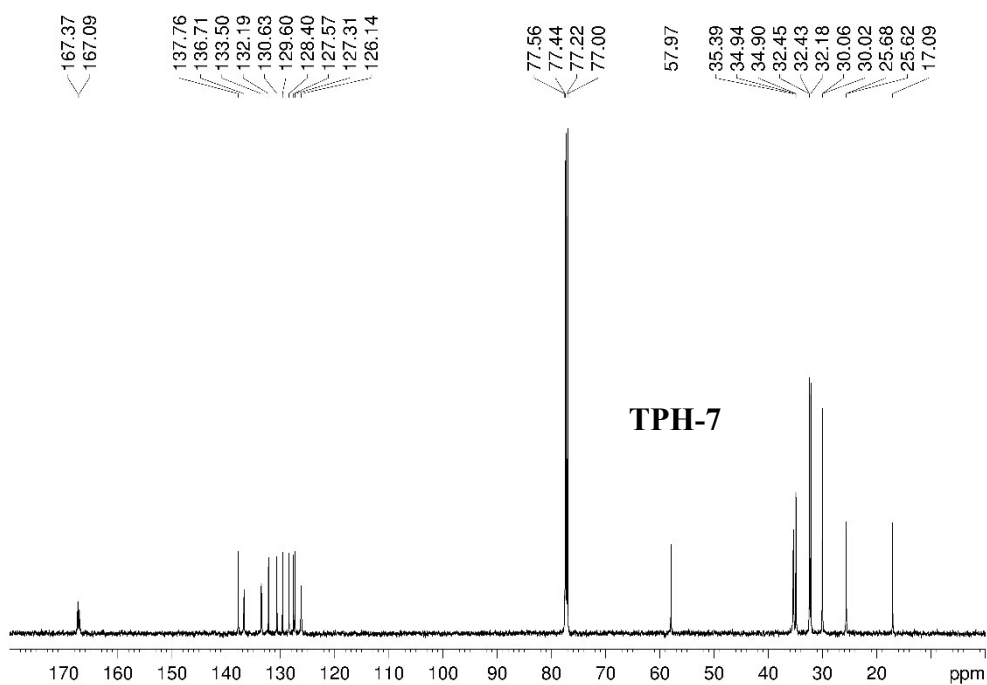



## 9. HRMS Spectra of c-4-c-7 and TPH-4-TPH-7

### Analysis Info

Analysis Name D:\Data\MALDI\2015\1119\4-1\_0\_A11\_000001.d  
 Method MALDI\_N\_100-900  
 Sample Name  
 Comment

Acquisition Date 11/19/2015 3:40:44 PM

Operator  
 Instrument solariX

### Acquisition Parameter

|                       |            |                      |           |                       |                          |
|-----------------------|------------|----------------------|-----------|-----------------------|--------------------------|
| Acquisition Mode      | Single MS  | Acquired Scans       | 6         | Calibration Date      | Thu Nov 19 03:32:21      |
| Polarity              | Negative   | No. of Cell Fills    | 1         | Data Acquisition Size | 2046576                  |
| Broadband Low Mass    | 202.1 m/z  | No. of Laser Shots   | 10        | Data Processing Size  | 2097152                  |
| Broadband High Mass   | 4600.0 m/z | Laser Power          | 29.4 lp   | Apodization           | Sine-Bell Multiplication |
| Source Accumulation   | 0.001 sec  | Laser Shot Frequency | 0.020 sec |                       |                          |
| Ion Accumulation Time | 0.300 sec  |                      |           |                       |                          |

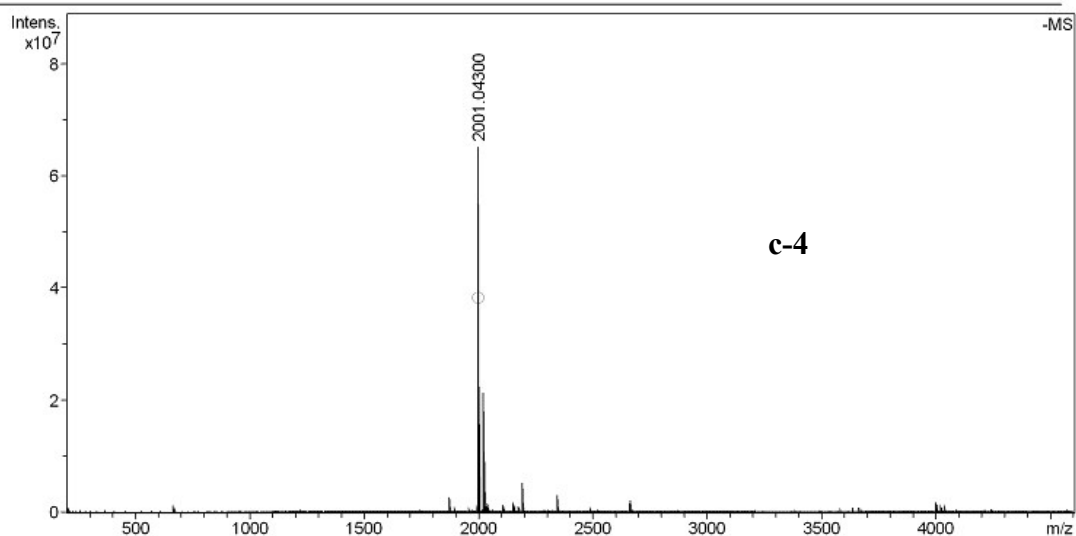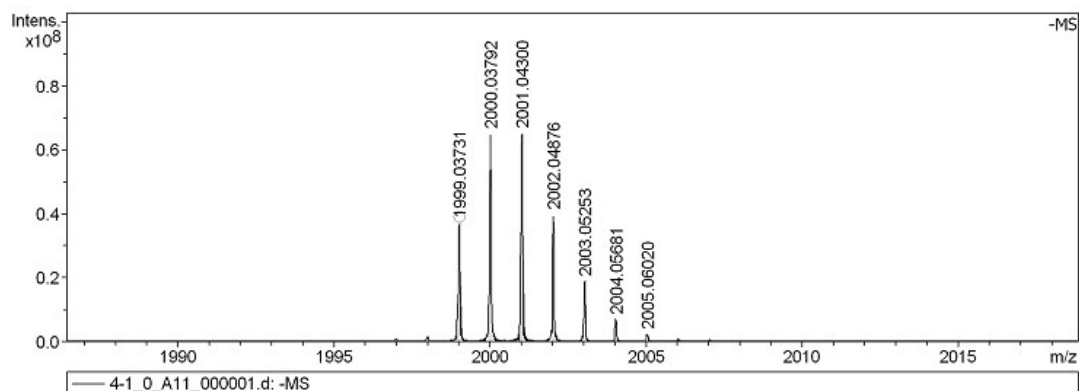

| Meas. m/z   | # | Ion Formula   | Score  | m/z         | err [ppm] | Mean err [ppm] | mSigma | rdb  | e <sup>-</sup> Conf | N-Rule |
|-------------|---|---------------|--------|-------------|-----------|----------------|--------|------|---------------------|--------|
| 1999.037313 | 1 | C132H138N6O12 | 100.00 | 1999.037822 | -0.3      | 0.4            | 148.7  | 67.0 | odd                 | ok     |

**Analysis Info**

Analysis Name D:\Data\MALDI\2015\1027\3\_0\_M9\_000001.d  
Method MALDI\_N\_100-900  
Sample Name  
Comment

Acquisition Date 10/27/2015 4:31:51 PM

Operator  
Instrument solariX

**Acquisition Parameter**

|                       |            |                      |           |                       |                          |
|-----------------------|------------|----------------------|-----------|-----------------------|--------------------------|
| Acquisition Mode      | Single MS  | Acquired Scans       | 14        | Calibration Date      | Tue Oct 27 03:43:13      |
| Polarity              | Negative   | No. of Cell Fills    | 1         | Data Acquisition Size | 2095152                  |
| Broadband Low Mass    | 202.1 m/z  | No. of Laser Shots   | 10        | Data Processing Size  | 4194304                  |
| Broadband High Mass   | 4100.0 m/z | Laser Power          | 27.0 Ip   | Apodization           | Sine-Bell Multiplication |
| Source Accumulation   | 0.001 sec  | Laser Shot Frequency | 0.020 sec |                       |                          |
| Ion Accumulation Time | 0.300 sec  |                      |           |                       |                          |

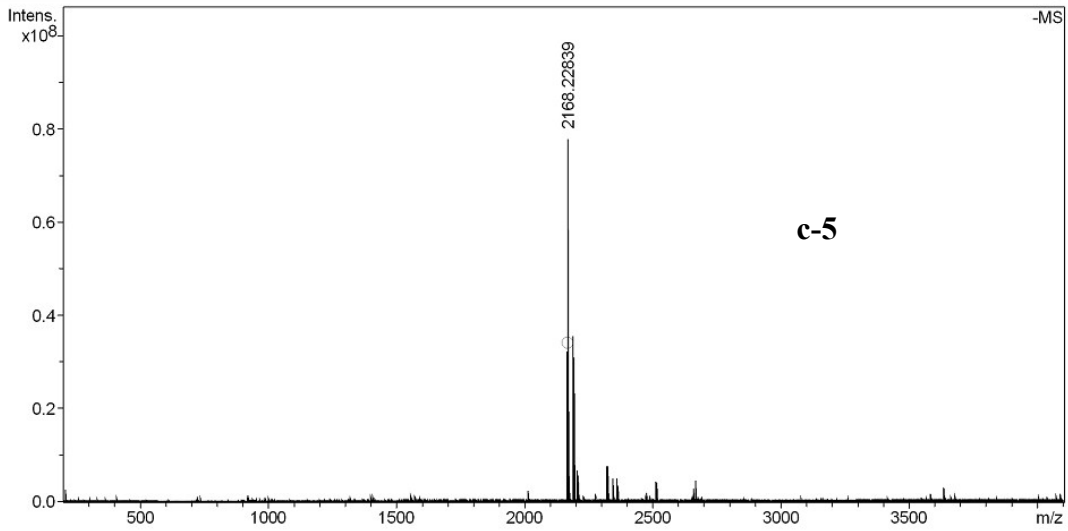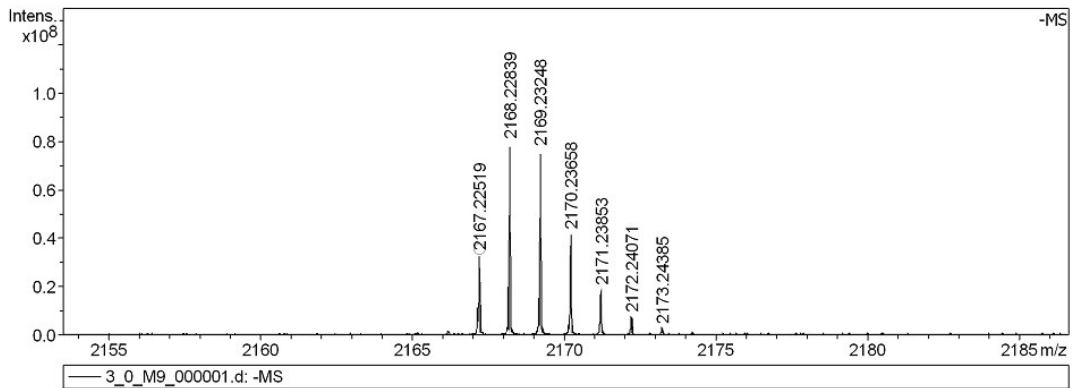

| Meas. m/z   | # | Ion Formula   | Score  | m/z         | err [ppm] | Mean err [ppm] | mSigma | rdb  | e <sup>-</sup> Conf | N-Rule |
|-------------|---|---------------|--------|-------------|-----------|----------------|--------|------|---------------------|--------|
| 2167.225193 | 1 | C144H162N6O12 | 100.00 | 2167.225623 | 0.2       | 0.0            | 97.9   | 67.0 | odd                 | ok     |

**Analysis Info**

Analysis Name D:\Data\MALDI\2015\1119\6-1\_0\_A12\_000003.d  
 Method MALDI\_N\_100-900  
 Sample Name  
 Comment

Acquisition Date 11/19/2015 3:45:52 PM

Operator  
 Instrument solariX

**Acquisition Parameter**

|                       |            |                      |           |                       |                          |
|-----------------------|------------|----------------------|-----------|-----------------------|--------------------------|
| Acquisition Mode      | Single MS  | Acquired Scans       | 6         | Calibration Date      | Thu Nov 19 03:32:21      |
| Polarity              | Negative   | No. of Cell Fills    | 1         | Data Acquisition Size | 2048576                  |
| Broadband Low Mass    | 202.1 m/z  | No. of Laser Shots   | 10        | Data Processing Size  | 2097152                  |
| Broadband High Mass   | 4600.0 m/z | Laser Power          | 34.2 lp   | Apodization           | Sine-Bell Multiplication |
| Source Accumulation   | 0.001 sec  | Laser Shot Frequency | 0.020 sec |                       |                          |
| Ion Accumulation Time | 0.300 sec  |                      |           |                       |                          |

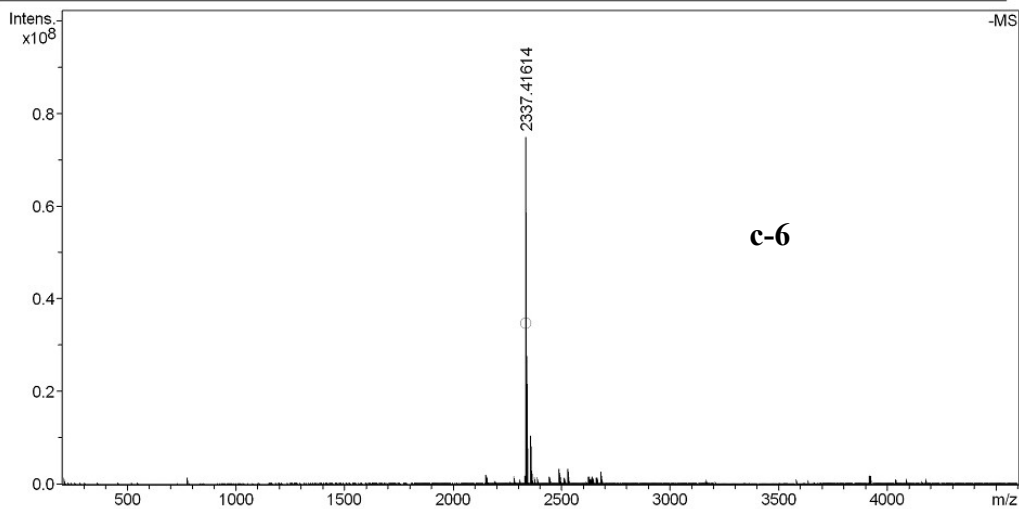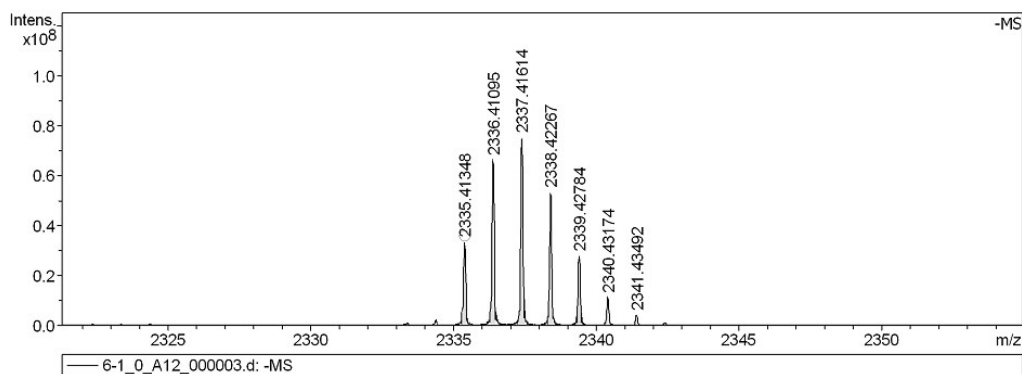

| Meas. m/z   | # | Ion Formula                                                      | Score  | m/z         | err [ppm] | Mean err [ppm] | mSigma | rdb  | e <sup>-</sup> Conf | N-Rule |
|-------------|---|------------------------------------------------------------------|--------|-------------|-----------|----------------|--------|------|---------------------|--------|
| 2335.413482 | 1 | C <sub>156</sub> H <sub>186</sub> N <sub>6</sub> O <sub>12</sub> | 100.00 | 2335.413424 | -0.0      | 1.0            | 116.3  | 67.0 | odd                 | ok     |

**Analysis Info**

Analysis Name D:\Data\MALDI\2015\1119\7-1\_0\_A13\_000001.d  
Method MALDI\_N\_100-900  
Sample Name  
Comment

Acquisition Date 11/19/2015 3:47:44 PM

Operator  
Instrument solariX

**Acquisition Parameter**

|                       |            |                      |           |                       |                          |
|-----------------------|------------|----------------------|-----------|-----------------------|--------------------------|
| Acquisition Mode      | Single MS  | Acquired Scans       | 6         | Calibration Date      | Thu Nov 19 03:32:21      |
| Polarity              | Negative   | No. of Cell Fills    | 1         | Data Acquisition Size | 2048576                  |
| Broadband Low Mass    | 202.1 m/z  | No. of Laser Shots   | 10        | Data Processing Size  | 2097152                  |
| Broadband High Mass   | 4600.0 m/z | Laser Power          | 35.2 lp   | Apodization           | Sine-Bell Multiplication |
| Source Accumulation   | 0.001 sec  | Laser Shot Frequency | 0.020 sec |                       |                          |
| Ion Accumulation Time | 0.300 sec  |                      |           |                       |                          |

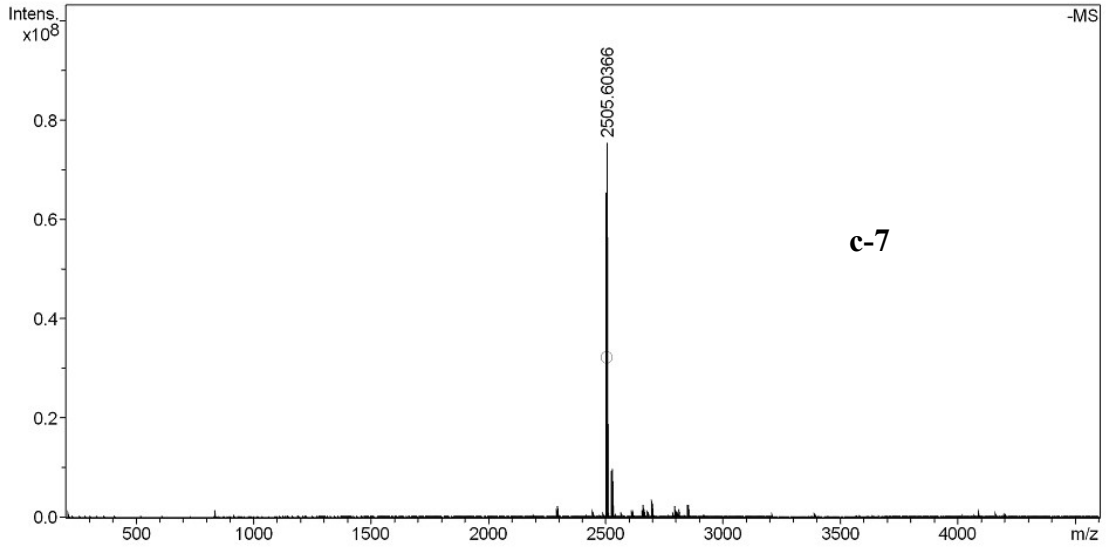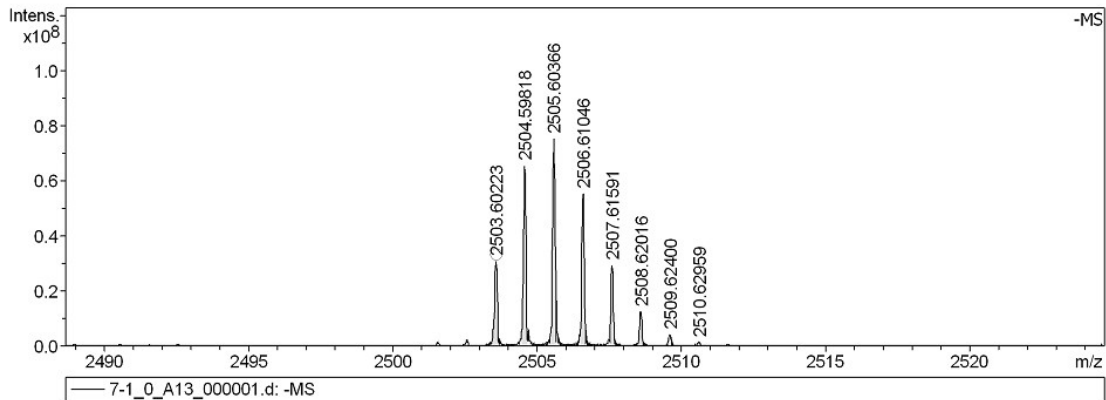

| Meas. m/z   | # | Ion Formula   | Score  | m/z         | err [ppm] | Mean err [ppm] | mSigma | rdb  | e <sup>-</sup> Conf | N-Rule |
|-------------|---|---------------|--------|-------------|-----------|----------------|--------|------|---------------------|--------|
| 2503.602227 | 1 | C168H210N6O12 | 100.00 | 2503.601225 | 0.4       | 0.9            | 93.8   | 67.0 | odd                 | ok     |

**Analysis Info**

Analysis Name D:\Data\MALDI\2015\1119\4\_0\_A8\_000009.d  
 Method MALDI\_N\_100-900  
 Sample Name  
 Comment

Acquisition Date 11/19/2015 3:20:10 PM

Operator  
 Instrument solariX

**Acquisition Parameter**

|                       |            |                      |           |                       |                          |
|-----------------------|------------|----------------------|-----------|-----------------------|--------------------------|
| Acquisition Mode      | Single MS  | Acquired Scans       | 10        | Calibration Date      | Wed Nov 18 04:39:25      |
| Polarity              | Negative   | No. of Cell Fills    | 1         | Data Acquisition Size | 2093152                  |
| Broadband Low Mass    | 202.1 m/z  | No. of Laser Shots   | 10        | Data Processing Size  | 4194304                  |
| Broadband High Mass   | 4000.0 m/z | Laser Power          | 20.0 lp   | Apodization           | Sine-Bell Multiplication |
| Source Accumulation   | 0.001 sec  | Laser Shot Frequency | 0.020 sec |                       |                          |
| Ion Accumulation Time | 0.300 sec  |                      |           |                       |                          |

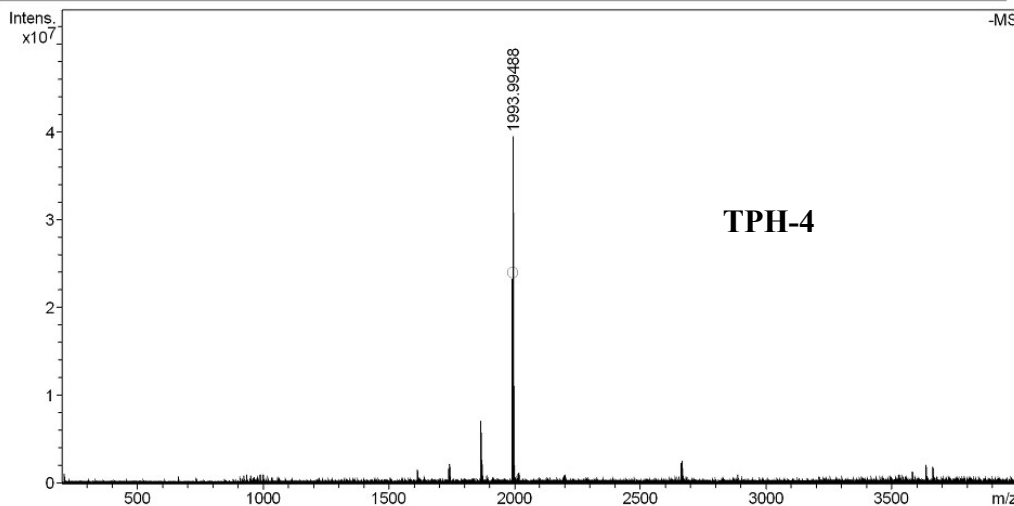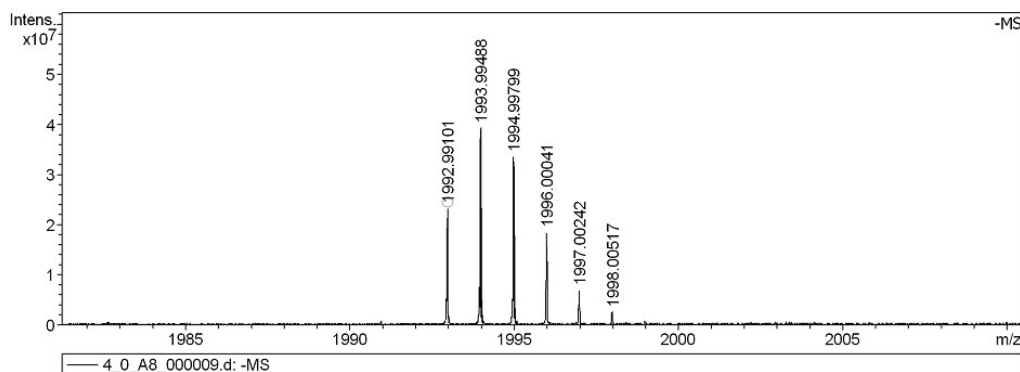

| Meas. m/z   | # | Ion Formula                                                      | Score  | m/z         | err [ppm] | Mean err [ppm] | mSigma | rdb  | e <sup>-</sup> Conf | N-Rule |
|-------------|---|------------------------------------------------------------------|--------|-------------|-----------|----------------|--------|------|---------------------|--------|
| 1992.991008 | 1 | C <sub>132</sub> H <sub>132</sub> N <sub>6</sub> O <sub>12</sub> | 100.00 | 1992.990872 | -0.1      | -0.1           | 65.1   | 70.0 | odd                 | ok     |

**Analysis Info**

Analysis Name D:\Data\MALDI\2015\1027\4\_0\_M10\_000002.d  
 Method MALDI\_N\_100-900  
 Sample Name  
 Comment

Acquisition Date 10/27/2015 4:35:02 PM

Operator  
 Instrument solariX

**Acquisition Parameter**

|                       |            |                      |           |                       |                          |
|-----------------------|------------|----------------------|-----------|-----------------------|--------------------------|
| Acquisition Mode      | Single MS  | Acquired Scans       | 5         | Calibration Date      | Tue Oct 27 03:43:13      |
| Polarity              | Negative   | No. of Cell Fills    | 1         | Data Acquisition Size | 2093152                  |
| Broadband Low Mass    | 202.1 m/z  | No. of Laser Shots   | 10        | Data Processing Size  | 4194304                  |
| Broadband High Mass   | 4100.0 m/z | Laser Power          | 25.4 lp   | Apodization           | Sine-Bell Multiplication |
| Source Accumulation   | 0.001 sec  | Laser Shot Frequency | 0.020 sec |                       |                          |
| Ion Accumulation Time | 0.300 sec  |                      |           |                       |                          |

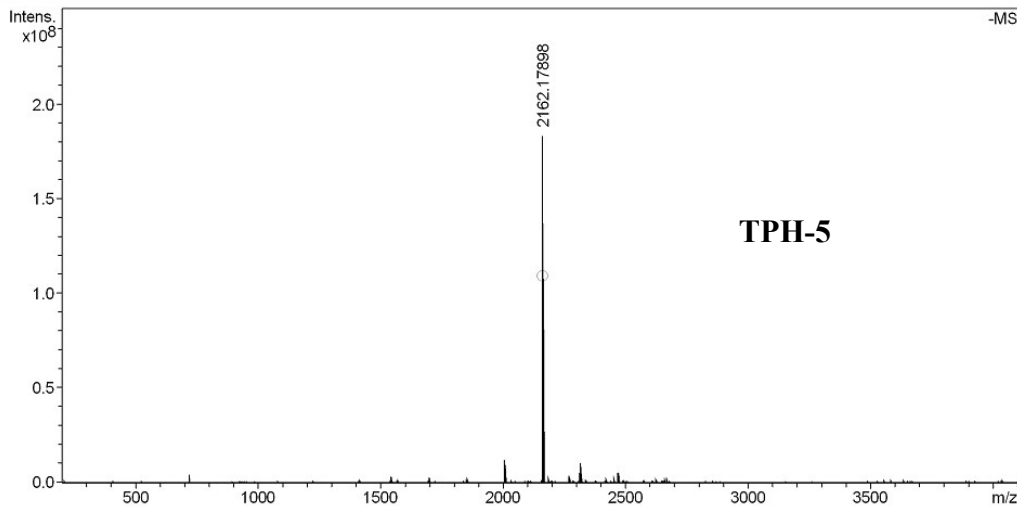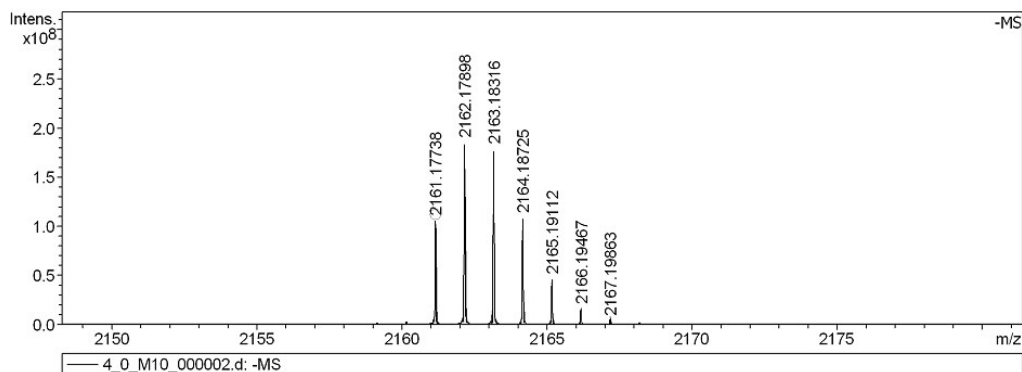

| Meas. m/z   | # | Ion Formula                                                      | Score  | m/z         | err [ppm] | Mean err [ppm] | mSigma | rdb  | e <sup>-</sup> Conf | N-Rule |
|-------------|---|------------------------------------------------------------------|--------|-------------|-----------|----------------|--------|------|---------------------|--------|
| 2161.177381 | 1 | C <sub>144</sub> H <sub>156</sub> N <sub>6</sub> O <sub>12</sub> | 100.00 | 2161.178673 | 0.6       | 0.9            | 80.3   | 70.0 | odd                 | ok     |

**Analysis Info**

Analysis Name D:\Data\MALDI\2015\1119\6\_0\_A9\_000004.d  
Method MALDI\_N\_100-900  
Sample Name  
Comment

Acquisition Date 11/19/2015 3:34:51 PM

Operator  
Instrument solariX

**Acquisition Parameter**

|                       |            |                      |           |                       |                          |
|-----------------------|------------|----------------------|-----------|-----------------------|--------------------------|
| Acquisition Mode      | Single MS  | Acquired Scans       | 10        | Calibration Date      | Thu Nov 19 03:32:21      |
| Polarity              | Negative   | No. of Cell Fills    | 1         | Data Acquisition Size | 2048576                  |
| Broadband Low Mass    | 202.1 m/z  | No. of Laser Shots   | 10        | Data Processing Size  | 2097152                  |
| Broadband High Mass   | 4600.0 m/z | Laser Power          | 28.8 lp   | Apodization           | Sine-Bell Multiplication |
| Source Accumulation   | 0.001 sec  | Laser Shot Frequency | 0.020 sec |                       |                          |
| Ion Accumulation Time | 0.300 sec  |                      |           |                       |                          |

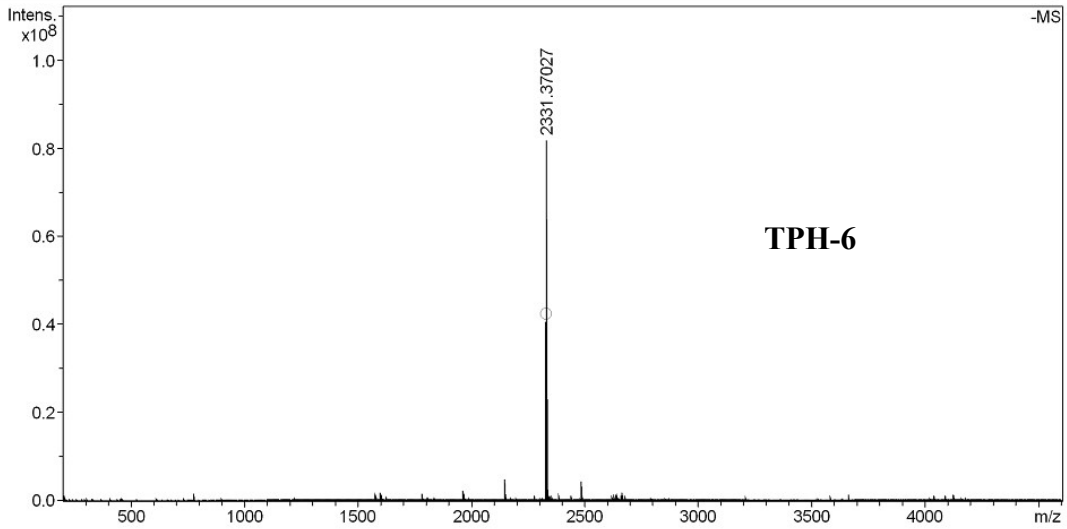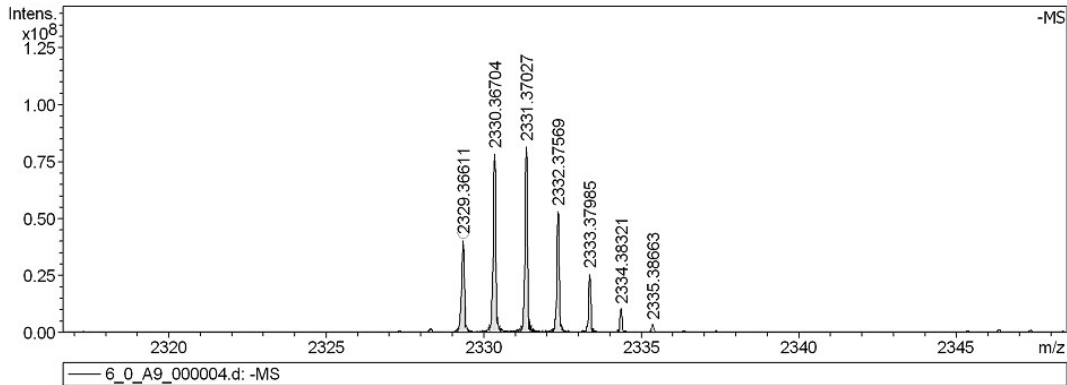

| Meas. m/z   | # | Ion Formula   | Score  | m/z         | err [ppm] | Mean err [ppm] | mSigma | rdb  | e <sup>-</sup> Conf | N-Rule |
|-------------|---|---------------|--------|-------------|-----------|----------------|--------|------|---------------------|--------|
| 2329.366113 | 1 | C156H180N6O12 | 100.00 | 2329.366474 | -0.2      | 0.7            | 79.3   | 70.0 | odd                 | ok     |

**Analysis Info**

Analysis Name D:\Data\MALDI\2015\1119\7\_0\_A10\_000001.d  
Method MALDI\_N\_100-900  
Sample Name  
Comment

Acquisition Date 11/19/2015 3:37:07 PM

Operator  
Instrument solariX

**Acquisition Parameter**

|                       |            |                      |           |                       |                          |
|-----------------------|------------|----------------------|-----------|-----------------------|--------------------------|
| Acquisition Mode      | Single MS  | Acquired Scans       | 6         | Calibration Date      | Thu Nov 19 03:32:21      |
| Polarity              | Negative   | No. of Cell Fills    | 1         | Data Acquisition Size | 2048576                  |
| Broadband Low Mass    | 202.1 m/z  | No. of Laser Shots   | 10        | Data Processing Size  | 2097152                  |
| Broadband High Mass   | 4600.0 m/z | Laser Power          | 32.8 lp   | Apodization           | Sine-Bell Multiplication |
| Source Accumulation   | 0.001 sec  | Laser Shot Frequency | 0.020 sec |                       |                          |
| Ion Accumulation Time | 0.300 sec  |                      |           |                       |                          |

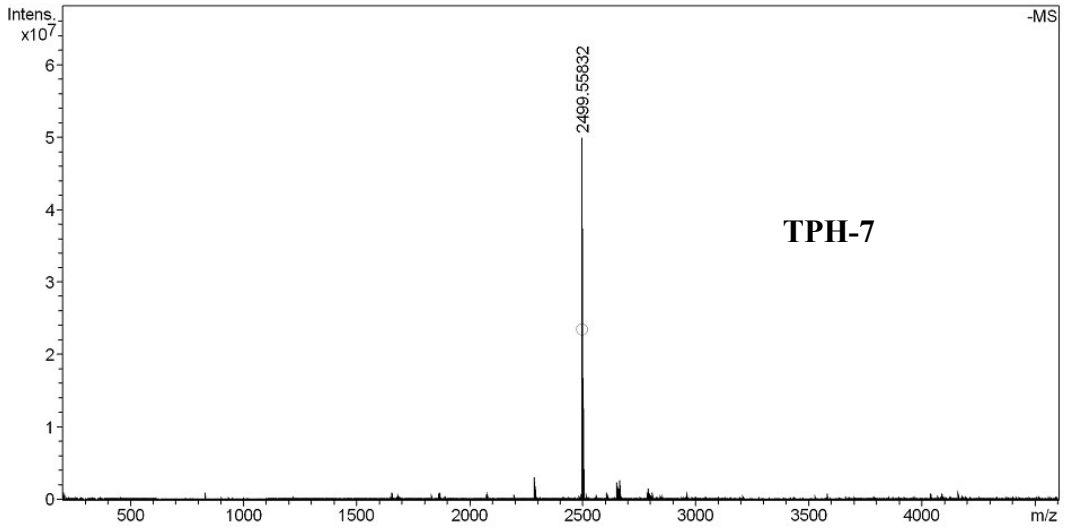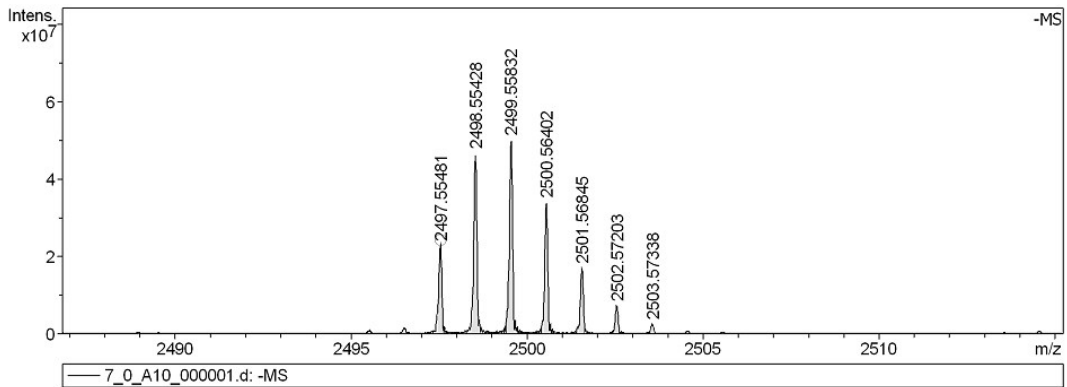

| Meas. m/z   | # | Ion Formula   | Score  | m/z         | err [ppm] | Mean err [ppm] | mSigma | rdb  | e <sup>-</sup> Conf | N-Rule |
|-------------|---|---------------|--------|-------------|-----------|----------------|--------|------|---------------------|--------|
| 2497.554808 | 1 | C168H204N6O12 | 100.00 | 2497.554275 | 0.2       | 0.5            | 57.0   | 70.0 | odd                 | ok     |
